# Supplementary material
Source: PubMed Central journal article supplement (PMC6204737)
Supplement: zii999092567s1.pdf [file zii999092567s1.pdf]

**Table. S1. List of recombinant plasmids and bacterial strains used in this study**

| <b>Plasmids</b>                            | <b>Genotype</b>                                                                                                                                                     | <b>Source</b> |
|--------------------------------------------|---------------------------------------------------------------------------------------------------------------------------------------------------------------------|---------------|
| 1. pQE30                                   | Amp <sup>r</sup> , <i>E. coli</i> expression vector                                                                                                                 | Qiagen        |
| 2. pRM1                                    | pQE30 plasmid containing 288-bp <i>esxA</i>                                                                                                                         | This study    |
| 3. pRM2                                    | pQE30 plasmid containing 978-bp <i>fbpB</i>                                                                                                                         | This study    |
| 4. pRM3                                    | pQE30 plasmid containing 1.27 Kb <i>fbpB-esxA</i> fusion fragment                                                                                                   | This study    |
| 5. pMW1                                    | pQE30 plasmid containing 2.2 Kb protective antigen of <i>Bacillus anthracis</i> ( <i>pag</i> )                                                                      | (1)           |
| <b>Bacterial strains</b>                   | <b>Genotype</b>                                                                                                                                                     | <b>Source</b> |
| 1. <i>Mycobacterium tuberculosis</i> H37Rv | Wild type (WT)                                                                                                                                                      | ATCC          |
| 2. <i>E. coli</i> M15                      | F <sup>-</sup> , $\Phi$ 80 $\Delta$ lacM15, <i>thi</i> , <i>lac</i> <sup>-</sup> , <i>mtl</i> , <i>recA</i> <sup>+</sup> , Km <sup>R</sup> containing pREP4 plasmid | Qiagen        |
| 3. RM1                                     | <i>E. coli</i> M15 transformed with pRM1                                                                                                                            | This study    |
| 4. RM2                                     | <i>E. coli</i> M15 transformed with pRM2                                                                                                                            | This study    |
| 5. RM3                                     | <i>E. coli</i> M15 transformed with pRM3                                                                                                                            | This study    |
| 6. MW1                                     | <i>E. coli</i> M15 transformed with pMW1                                                                                                                            | This study    |

**Table. S2. GC-MS peak report total ion chromatogram (TIC) of Mtb PLG**

| Peak No. | R.Time        | Area            | Area %       | Name                                                                                           |
|----------|---------------|-----------------|--------------|------------------------------------------------------------------------------------------------|
| 1        | 12.765        | 588569          | 2.36         | N-( 4,4-DICYANO-3-PHENYL-1,3-BUTADIENYL) N,2,2-TRIMETHYLPROPANAMIDE                            |
| 2        | 13.744        | 1533527         | 6.15         | N-( 4,4-DICYANO-3-PHENYL-1,3-BUTADIENYL)-N,2,2-TRIMETHYLPROPANAMIDE                            |
| 3        | 13.993        | 448890          | 1.80         | N-( 4,4-DICYANO-3-PHENYL-1,3-BUTADIENYL)-N,2,2-TRIMETHYLPROPANAMIDE                            |
| 4        | 14.637        | 1146314         | 4.60         | CHROMIUM, PENTACARBONYL[1-(DIETHYLAMINO)-2 METHYL-3-PHENYL-3-(2-PROPENYLTHIO)-2 PROPENYLIDENE] |
| 5        | 16.658        | 527463          | 2.12         | Diethyl Phthalate                                                                              |
| 6        | 17.154        | 366835          | 1.47         | HEPTANE, 3,5-DIMETHYL- 3,5DIMETHYLHEPTANE                                                      |
| 7        | 18.497        | 544867          | 2.19         | D-Glutamic acid, N-(pentafluoropropionyl)-, di(isopropyl) ester                                |
| <b>8</b> | <b>18.821</b> | <b>16184993</b> | <b>64.96</b> | <b>HEPTAFLUOROBUTYRYL-ISOBUTYL DERIVATIVE OF GLUTAMIC ACID</b>                                 |
| 9        | 20.410        | 939548          | 3.77         | 1,2-Benzenedicarboxylic acid, bis(2-methylpropyl) ester                                        |
| 10       | 22.524        | 643281          | 2.58         | TRICOSANE                                                                                      |
| 11       | 22.673        | 479557          | 1.92         | Palmitic Acid, TMS derivative                                                                  |
| 12       | 24.033        | 1513100         | 6.07         | Benzenemethanol, .alpha.,.alpha.-diphenyl                                                      |

**Figure S1: Authenticity and purity of antigens used in this study**

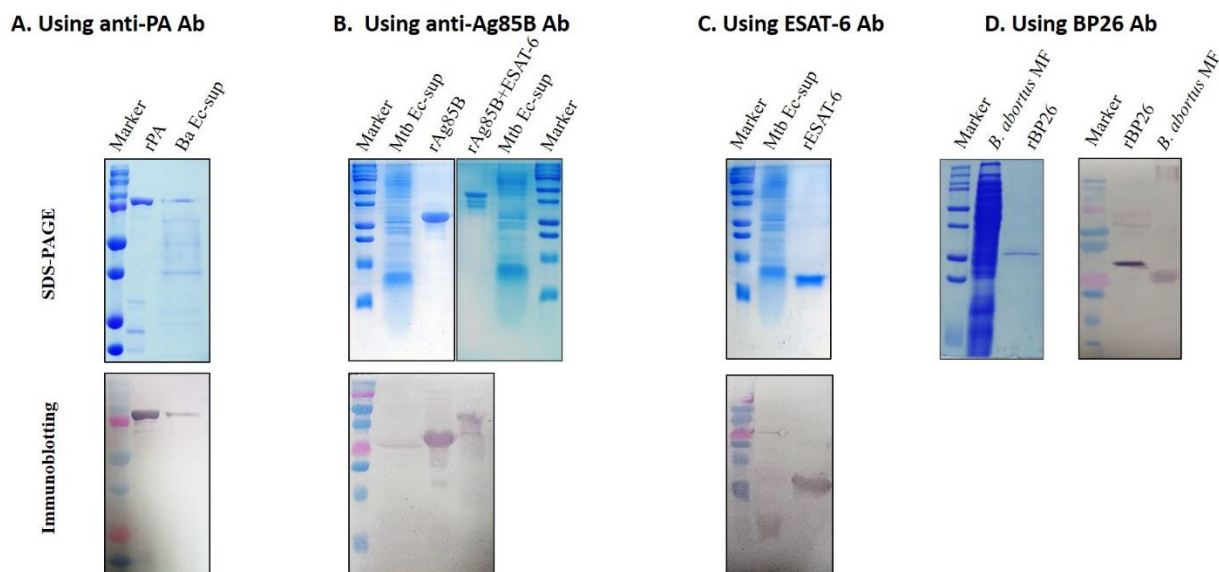

**Figure S1.** The authenticity and purity of the antigens used in this study, was ascertained by SDS-PAGE and immunoblotting analysis of the recombinant proteins alongside their native forms as positive controls. For immunoblotting, antibodies were raised in mice against the respective recombinant protein with multiple boosters. **A.** SDS-PAGE and immunoblotting analysis using anti-PA antibodies. rPA: recombinant PA expressed in *E. coli*, Ba Ec-sup: *Bacillus anthracis* cell culture supernatant. **B.** SDS-PAGE and immunoblotting analysis using anti-Ag85B antibodies. Mtb Ec-sup: Mycobacterium tuberculosis extracellular supernatant (culture filtrate), rAg85B: recombinant Ag85B expressed in *E. coli*, rAg85B-ESAT-6: a chimeric fusion of Ag85B and ESAT-6 antigens expressed in *E. coli*. **C.** SDS-PAGE and immunoblotting analysis using anti-ESAT-6 antibodies. rESAT-6: recombinant ESAT-6 antigen expressed in *E. coli* and **D.** SDS-PAGE and immunoblotting analysis using anti-BP26 antibodies. rBP26: recombinant BP26 antigen of *Brucella abortus*, expressed in *E. coli*, *B. abortus* MF: purified membrane fraction of *B. abortus*.

## References

1. Gupta P, Waheed S, Bhatnagar R. 1999. Expression and purification of the recombinant protective antigen of *Bacillus anthracis*. *Protein Expr Purif* 16:369-376.
